# Supplementary material for: Realization of an Artificial Visual Nervous System using an Integrated Optoelectronic Device Array
Source: PubMed Central journal article supplement — Adv Mater. 2021 Oct 11;33(51):2105485. doi: 10.1002/adma.202105485 (PMC11468419; doi:10.1002/adma.202105485), 2021-10-11
Supplement: ADMA-33-2105485-s001.pdf [file ADMA-33-2105485-s001.pdf]

# ADVANCED MATERIALS

## Supporting Information

for *Adv. Mater.*, DOI: 10.1002/adma.202105485

Realization of an Artificial Visual Nervous System using  
an Integrated Optoelectronic Device Array

*Tae-Ju Lee, Kwang-Ro Yun, Su-Kyung Kim, Jong-Ho  
Kim, Junyoung Jin, Kee-Baek Sim, Da-Hoon Lee, Gyu  
Weon Hwang, and Tae-Yeon Seong\**

## Supporting Information

**Realization of an Artificial Visual Nervous System using an Integrated Optoelectronic Device Array**

*Tae-Ju Lee, Kwang-Ro Yun, Su-Kyung Kim, Jong-Ho Kim, Junyoung Jin, Kee-Baek Sim, Da-Hoon Lee, Gyu Weon Hwang, and Tae-Yeon Seong\**

T.-J. Lee, D.-H. Lee, Prof. T.-Y. Seong  
Department of Nanophotonics  
Korea University  
145 Anam-ro, Seongbuk-gu, Seoul 02841, Republic of Korea  
E-mail: tyseong@korea.ac.kr

K.-R. Yoon, S.-K. Kim, J.-H. Kim, K.-B. Sim, Prof. T.-Y. Seong  
Department of Materials Science and Engineering  
Korea University  
145 Anam-ro, Seongbuk-gu, Seoul 02841, Republic of Korea  
E-mail: tyseong@korea.ac.kr

J. Jin, Dr. G. W. Hwang  
Center for Neuromorphic Engineering  
Korea Institute of Science and Technology (KIST)  
5, Hwarang-ro 14-gil, Seongbuk-gu, Seoul 02792, Republic of Korea

Keywords: sensory adaptation, artificial synapses, perovskite patterning, polymer electrolytes

**Note S1. Desensitization mechanism of mechanotransducer channel in biological sensory neurons.**

The mechanism of desensitization that underlies physiological adaptation process can be described for the time-dependent mechanosensitive channel gating, as shown in Figure S23.

The adaptation of mechanotransducer channel is related to the relaxation of tension by the interaction between tension-sensing element and hinge of the ion-channel gate. Precisely, the initial state of mechanotransducer channel is closed and blocks the flow of ion migration.

However, external stimuli can trigger tension-sensing element, which tempts the mechanotransducer channel to open and makes it favorable for the flow of ions, and may lead to peak response. As the stimulus is maintained, the relaxation of tension by the free energy reduction of the mechanotransducer channel may result in a decrease in ion flux, which may no longer sustain channel activity. Finally, mechanotransducer channel either inactivates or adapts.

**Note S2. Calculations that derive  $t_{tr}$  by differentiating Equation (6).**

In the EPSC responses of a DAVAN device, as shown in Figure 4d, facilitation and inhibition behaviours were observed. Assuming that the EPSC<sub>peak</sub> curves were fitted by composition of two different exponential, growth and decay functions. Moreover, to further understand the dominance of sensitization and habituation,  $t_{tr}$  was calculated by differentiating Equation (6) from  $t$  as following equation:

$$\frac{dEPSC_{peak}}{dt} = \frac{A}{\tau_{se}\tau_{ha}} [(\tau_{se} + \tau_{ha})e^{-t/\tau_{se}} - \tau_{se}]e^{-t/\tau_{ha}} \quad (S1)$$

From the above equation,  $t_{tr}$  can be derived when  $\frac{dEPSC_{peak}}{dt} = 0$ , and determined by following equation:

$$t_{tr} = \ln\left(1 + \frac{\tau_{ha}}{\tau_{se}}\right)^{\tau_{se}} \quad (S2)$$

3D plot of  $t_{tr}$  and associated fitting surface using Equation (8) are summarized as a function of  $\tau_{se}$  and  $\tau_{ha}$ , as shown in Figure S28b.

**Note S3. Formation of hydrophilic/hydrophobic patterned surfaces with insertion of SiO<sub>x</sub> film as an auxiliary layer.**

The surface energy can be modulated through tuning the composition of functional groups of SAMs on the surfaces of various substrate such as metals and oxides. In general, functional groups of the SAMs are attached to the surfaces to be paired appropriately, following the “hard-soft” rules associated with the polarizability of the participants. Especially, silane groups (SiCl<sub>3</sub>) of the ODTS and OTS can react with hydroxyl-rich oxide surfaces such as glass, SiO<sub>x</sub> film, AlO<sub>x</sub> film, and nylon polymer. However, they are unpolarizable with metal surfaces such as Au film, Ag film, and Pt film (see Figure S3 and Table S1). For the formation of uniform hydrophilic/hydrophobic patterned surfaces, an hydroxyl-rich SiO<sub>x</sub> film was inserted on the substrate in process prior to SAM coating.

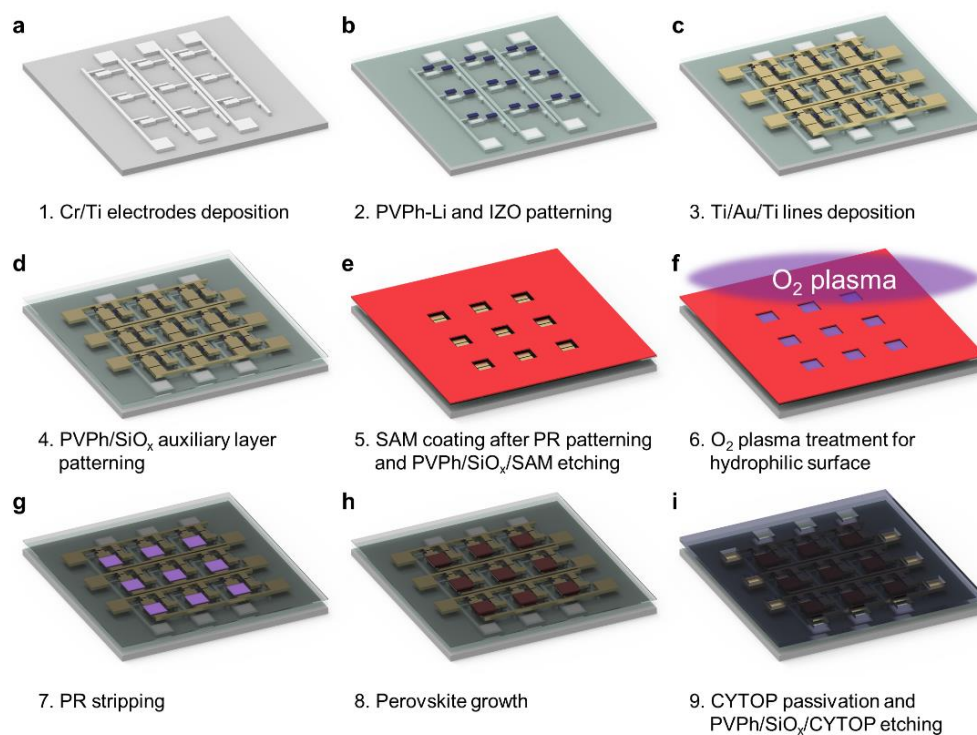

**Figure S1.** a-i) A fabrication process of the  $3 \times 3$  DAVAN device array for emulating a visual nervous system.

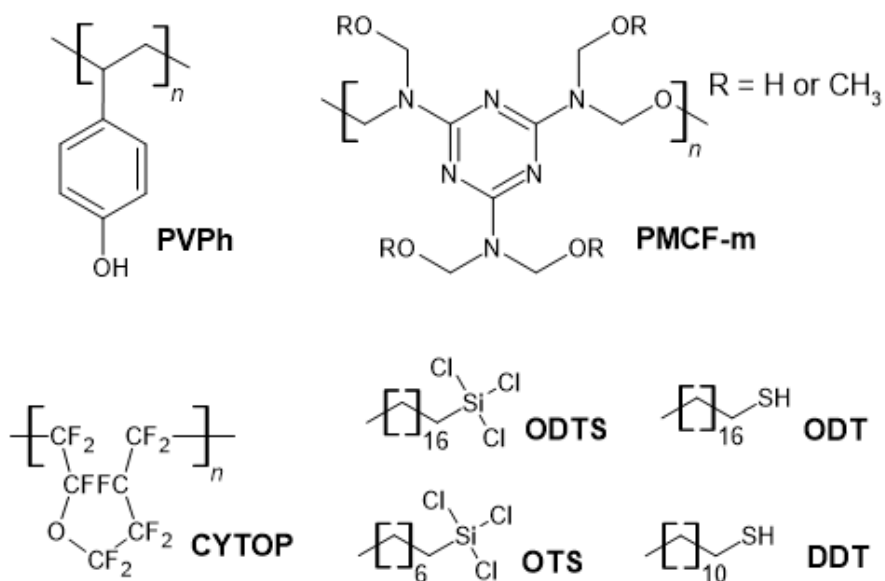

**Figure S2.** Molecular structure of poly(4-vinylphenol) (PVPh), poly(melamine-co-formaldehyde) methylated (PMCF-m), CYTOP, octadecyltrichlorosilane (ODTS), octyltrichlorosilane (OTS), 1-octadecanethiol (ODT), and 1-dodecanethiol (DDT).

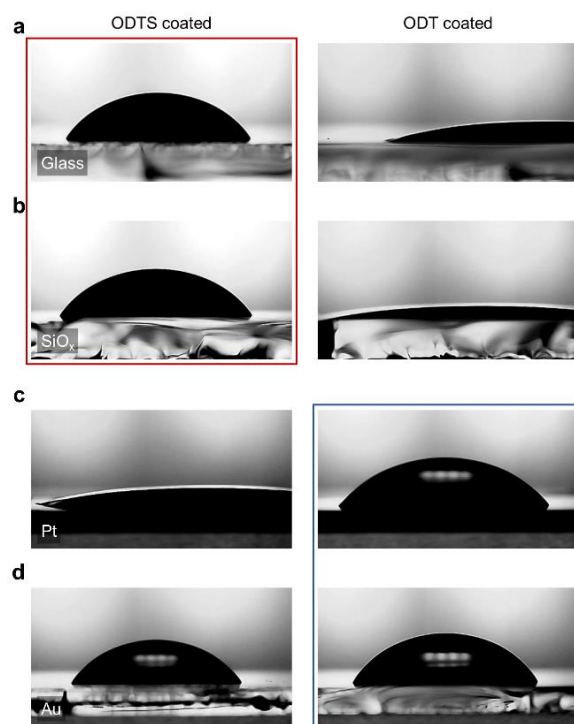

**Figure S3.** Photograph images of the contact angles of DMF on various surfaces treated by ODTS and ODT. a) glass, b)  $\text{SiO}_x$  film on glass, c) Pt film on glass, and d) Au film on glass. The measured contact angles are described in Table S1.



**a** glass

| Contact angle (°) | ODTS        | OTS        | ODT        | DDT        |
|-------------------|-------------|------------|------------|------------|
| DI                | 108.3 ± 1.8 | 13.3 ± 1.2 | 35.9 ± 2.1 | 25.1 ± 2.0 |
| DMF               | 59.2 ± 2.7  | 54.5 ± 1.7 | 19.4 ± 1.5 | 9.4 ± 0.7  |

**b** SiO<sub>x</sub> film on glass

| Contact angle (°) | ODTS        | OTS         | ODT        | DDT        |
|-------------------|-------------|-------------|------------|------------|
| DI                | 109.0 ± 1.2 | 107.9 ± 0.6 | 25.8 ± 2.2 | 20.6 ± 0.8 |
| DMF               | 57.6 ± 1.5  | 52.3 ± 1.5  | 13.4 ± 0.6 | 11.6 ± 1.4 |

**c** Pt film on glass

| Contact angle (°) | ODTS       | OTS        | ODT         | DDT        |
|-------------------|------------|------------|-------------|------------|
| DI                | 81.4 ± 1.2 | 81.4 ± 1.2 | 105.0 ± 0.9 | 94.4 ± 1.6 |
| DMF               | 12.3 ± 1.3 | 14.7 ± 0.9 | 49.3 ± 2.7  | 32.4 ± 1.7 |

**d** Au film on glass

| Contact angle (°) | ODTS       | OTS        | ODT         | DDT         |
|-------------------|------------|------------|-------------|-------------|
| DI                | 94.1 ± 3.0 | 88.2 ± 3.5 | 106.9 ± 0.8 | 104.9 ± 1.1 |
| DMF               | 54.1 ± 1.4 | 29.4 ± 2.7 | 57.4 ± 1.6  | 56.3 ± 1.7  |

**Table S1.** Measured contact angles of DI and DMF on various surfaces treated by ODTS, OTS, ODT, and DDT. a) glass, b) SiO<sub>x</sub> film on glass, c) Pt film on glass, and d) Au film on glass.

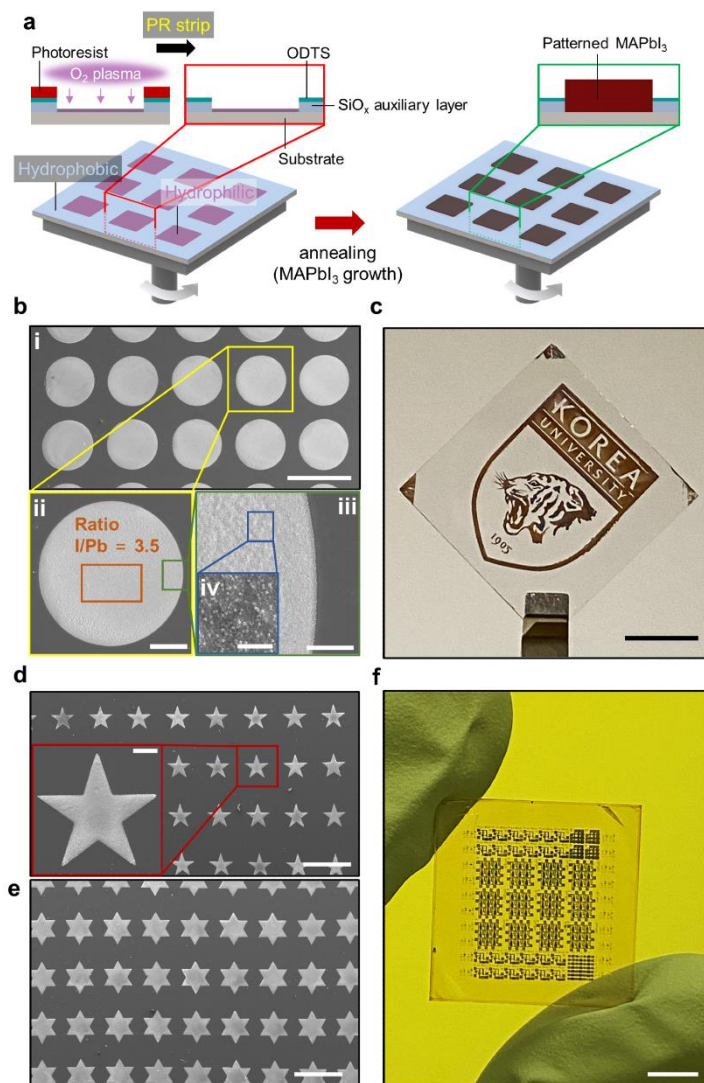

**Figure S4.** a) A synthesis process of perovskite arrays on a hydrophilic/hydrophobic treated substrate using spin-coating. b) i) SEM image of circularly patterned MAPbI<sub>3</sub> arrays on SiO<sub>x</sub>-assisted glass substrate (scale bar: 500 μm), ii) its magnified SEM image and EDS map (scale bar: 100 μm), iii) SEM image of edge side of film (scale bar: 20 μm), and iv) another magnified SEM image (scale bar: 2 μm). c) Photograph image of a sophisticatedly patterned MAPbI<sub>3</sub> film (scale bar: 10 mm). d) i) SEM image of stellately patterned MAPbI<sub>3</sub> arrays (scale bar: 500 μm) and ii) its magnified SEM image (scale bar: 50 μm). e) Another shaped SEM image of patterned MAPbI<sub>3</sub> arrays (scale bar: 500 μm). f) Photograph image of fully processed DAVAN arrays on glass substrate of dimensions 2 cm × 2 cm (scale bar: 5 mm).

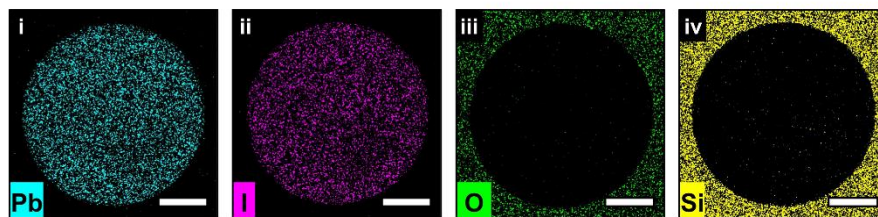

**Figure S5.** EDS maps of i) Pb, ii) I, iii) O, and iv) Si obtained from the circularly patterned MAPbI<sub>3</sub> film (scale bar: 100  $\mu$ m).

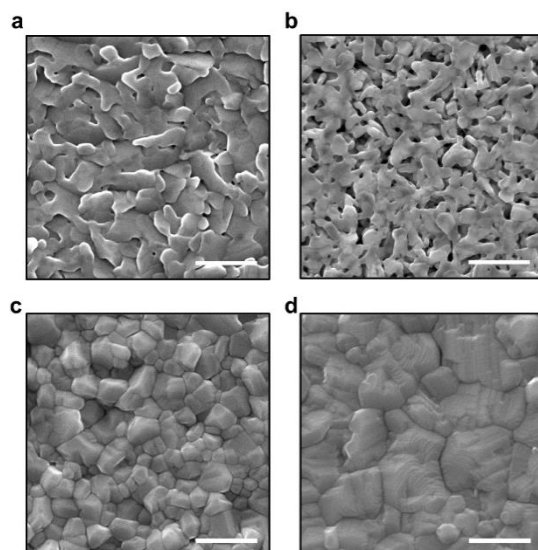

**Figure S6.** SEM images of as-synthesized a) c-PbI<sub>2</sub> film, b) p-PbI<sub>2</sub> film, c) MAPbI<sub>3</sub> film from c-PbI<sub>2</sub>, and d) MAPbI<sub>3</sub> film from p-PbI<sub>2</sub>. All scale bars denote 1 μm. For comparison, c-PbI<sub>2</sub> films was prepared by a conventional annealing method. In other words, the as-spin-coated PbI<sub>2</sub> films were annealed at 90 °C for 5 min instead of being immersed in IPA. A compact morphology of MAPbI<sub>3</sub> film was obtained by using anti-solvent extraction method.

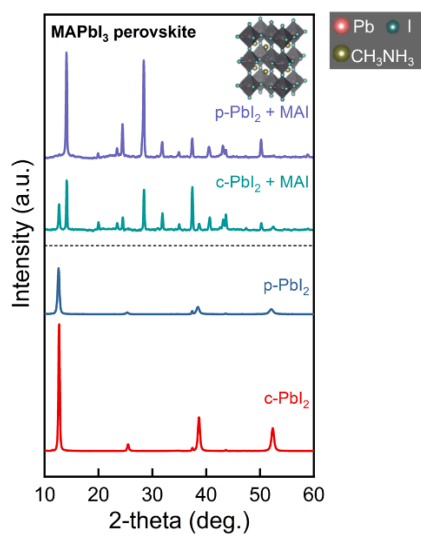

**Figure S7.** XRD profiles of MAPbI<sub>3</sub> and PbI<sub>2</sub> films on glass prepared by conventional annealing method (c-PbI<sub>2</sub> + MAI) and anti-solvent extraction method (p-PbI<sub>2</sub> + MAI).

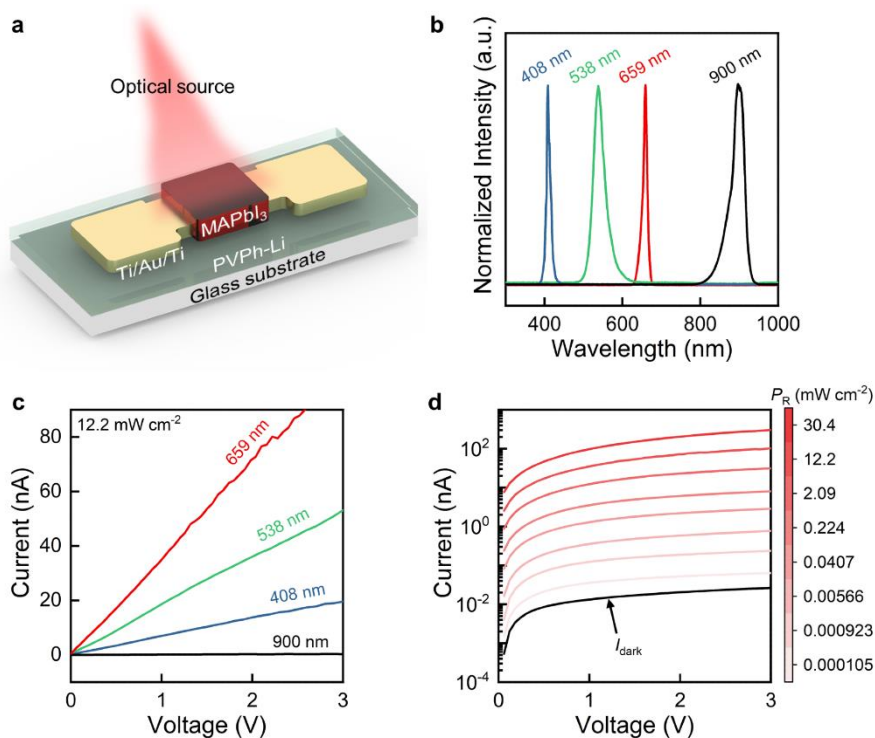

**Figure S8.** a) Schematic illustration of MAPbI<sub>3</sub> PD. b) Emission spectra of 408, 538, 659, and 900 nm laser diodes. c) *I*-*V* curves of the MAPbI<sub>3</sub> PD under light irradiation (12.2 mW cm<sup>-2</sup>) with different wavelengths. d) *I*-*V* curves of the MAPbI<sub>3</sub> PD under different optical power densities under a bias voltage of 3 V.

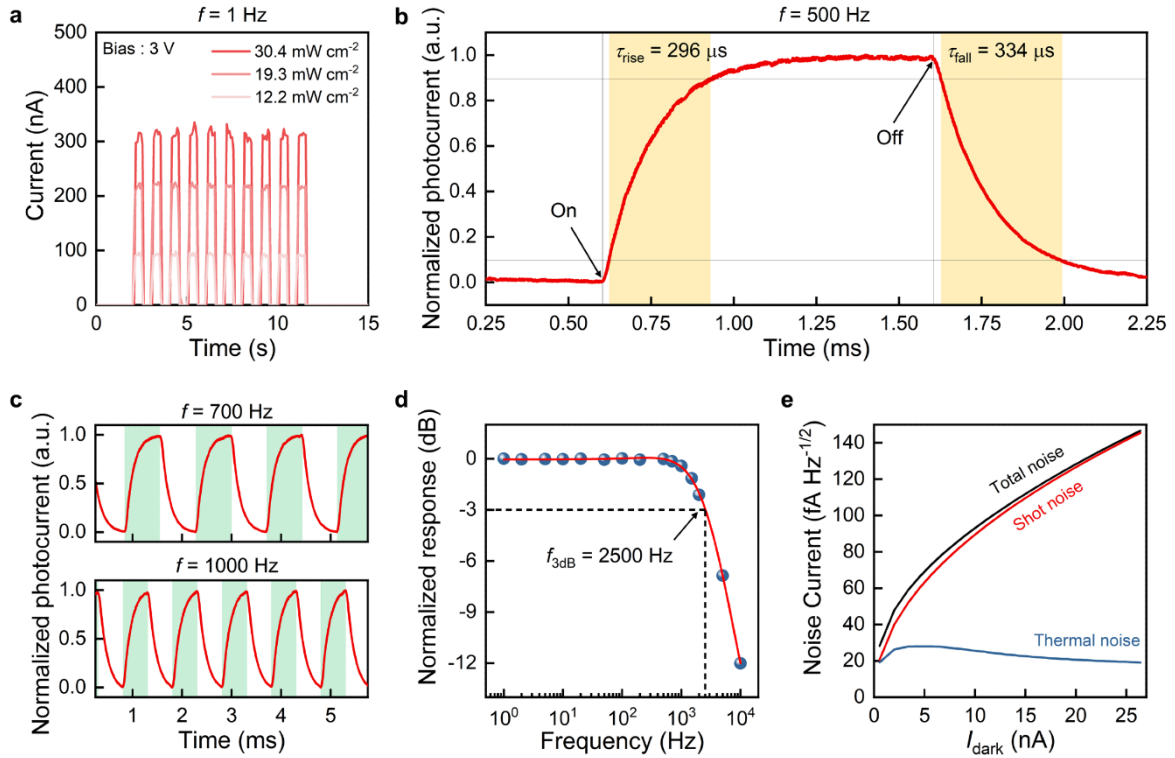

**Figure S9.** a) Photoreponse of the MAPbI<sub>3</sub> PD under different  $P_R$  at 3 V bias. High-frequency photoreponse of the MAPbI<sub>3</sub> PD under  $P_R$  of 30.4 mW cm<sup>-2</sup> with b) 500, and c) 700 and 1000 Hz. d) 3 dB bandwidth of the MAPbI<sub>3</sub> PD at 3 V bias. e) The plot of calculated noise current versus  $I_{\text{dark}}$  of the MAPbI<sub>3</sub> PD. Two noise currents, shot noise and thermal noise, are the main contributor to  $I_{\text{dark}}$  which fluctuates randomly. The total noise current can be expressed as  $I_{\text{total noise}} = \sqrt{I_{\text{shot noise}}^2 + I_{\text{thermal noise}}^2}$ . When the MAPbI<sub>3</sub> PD is operated at 3 V bias, the thermal noise is much lower than the shot noise. In this study, the thermal noise can be negligible and the detectivity of the device can be limited by the larger shot noise.

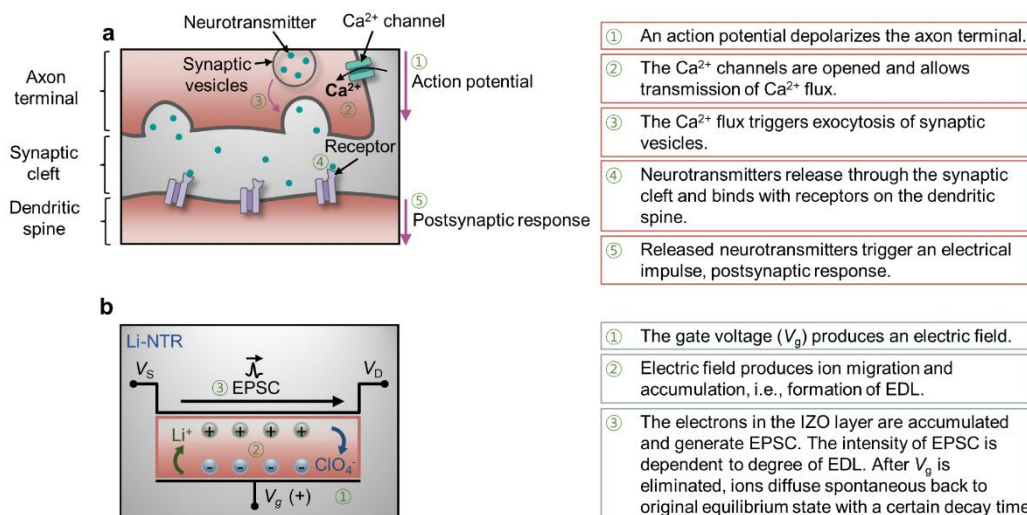

**Figure S10.** a) An overview of electrical information transmission process from presynaptic neuron to postsynaptic neuron. b) An overview of the operating mechanism of Li-NTR similar to the biological synaptic information transmission process.



| Synaptic device structure                                                | Sensory elements                                                                                                   | Sensory modality   | Adaptation functionality | Stimulus pulse width | Adaptation decay constant <sup>a)</sup> | Energy consumption with/without adaptation <sup>b)</sup>                                         | Ref.      |
|--------------------------------------------------------------------------|--------------------------------------------------------------------------------------------------------------------|--------------------|--------------------------|----------------------|-----------------------------------------|--------------------------------------------------------------------------------------------------|-----------|
| TiN/Ti/HfO <sub>2</sub> /W                                               | –                                                                                                                  | –                  | Yes                      | 10–100 ms            | 20–40 ms                                | –                                                                                                | [S5]      |
| Pt/LLTO/Pt                                                               | –                                                                                                                  | –                  | Yes                      | 0.4 s                | –                                       | –                                                                                                | [S6]      |
| ITO/PVA:CaCl <sub>2</sub>                                                | CNT-coated PDMS pressure sensor and PEA <sub>2</sub> MA <sub>2</sub> Pb <sub>3</sub> I <sub>10</sub> photodetector | Pressure and Light | –                        | 1–10 s               | –                                       | –                                                                                                | [S7]      |
| CsPb(Br <sub>0.5</sub> I <sub>0.5</sub> ) <sub>3</sub> /MoS <sub>2</sub> | CsPb(Br <sub>0.5</sub> I <sub>0.5</sub> ) <sub>3</sub>                                                             | Light              | Yes                      | 0.5 s                | –                                       | –                                                                                                | [S8]      |
| TiN/Li <sub>x</sub> SiO <sub>y</sub> /Pt                                 | –                                                                                                                  | –                  | Yes                      | 0.1–700 μs           | –                                       | 100 μJ/ 206 μJ in 80 ms (pulse period of 3 ms, pulse width of 700 μs, and voltage bias of 3.2 V) | [S9]      |
| Pentacene/PMMA/NT-CN                                                     | NT-CN                                                                                                              | Light              | –                        | 20–2000 ms and DC    | –                                       | –                                                                                                | [S10]     |
| IGZO/SAO                                                                 | CdSe photosensor                                                                                                   | Light              | Yes                      | 0.5 s                | –                                       | –                                                                                                | [S11]     |
| PTCDI-C <sub>8</sub> /CuPc/PTCDI-C <sub>8</sub>                          | PTCDI-C <sub>8</sub> /CuPc/PTCDI-C <sub>8</sub>                                                                    | Oxygen             | –                        | 0.1–0.4 s            | –                                       | –                                                                                                | [S12]     |
| PTCDA/MoS <sub>2</sub>                                                   | PTCDA                                                                                                              | Light              | –                        | 25–400 ms            | –                                       | –                                                                                                | [S13]     |
| CsPbBr <sub>3</sub> /MoS <sub>2</sub>                                    | CsPbBr <sub>3</sub>                                                                                                | Light              | Yes                      | 0.04–4 s             | –                                       | 1 μJ/ 1.7 μJ in 5 s (38 mW cm <sup>-2</sup> and gate bias of 15 V)                               | [S14]     |
| PDPP3T/PVCN/PVA/PBTTT/PVCN                                               | –                                                                                                                  | –                  | Yes                      | 4 s                  | 0.06–4 s                                | 0.1 μJ/ 3.5 μJ in 5 s (fast adaptation device with gate bias of –6 V)                            | [S15]     |
| In <sub>2</sub> O <sub>3</sub> /AlLiO                                    | –                                                                                                                  | –                  | –                        | 30–200 ms            | –                                       | –                                                                                                | [S16]     |
| MoS <sub>2</sub> / (PEGDA:HOMPP:[EMIM][TFSI])                            | PTFE pressure sensor                                                                                               | Pressure           | –                        | 0.08–1.75 s          | –                                       | –                                                                                                | [S17]     |
| ZnO/PVPh                                                                 | –                                                                                                                  | –                  | –                        | 0.1–5 s              | –                                       | –                                                                                                | [S18]     |
| Au/Nafion/ITO                                                            | PDMS pressure sensor                                                                                               | Pressure           | –                        | 0.1–0.5 s            | –                                       | –                                                                                                | [S19]     |
| Nafion/WO <sub>3</sub>                                                   | –                                                                                                                  | –                  | –                        | 5 ms                 | –                                       | –                                                                                                | [S20]     |
| rGO/PEO:LiClO <sub>4</sub>                                               | –                                                                                                                  | –                  | –                        | 40–187 ms            | –                                       | –                                                                                                | [S21]     |
| PDPP3T:PCBM/PVCN/PVA/PBTTT:PCBM/PVCN                                     | PDPP3T:PCBM                                                                                                        | Light              | Yes                      | few second           | 0.2–1000 s                              | 0.40 μJ/ 3.07 μJ in 5 s (1 × 10 <sup>6</sup> cd m <sup>-2</sup> )                                | [S22]     |
| IZO/PVPh-Li                                                              | MAPbI <sub>3</sub> photodetector                                                                                   | Light              | Yes                      | 0.5 s                | 3–329 s                                 | 135 μJ/ 700 μJ in 50 s (P <sub>R</sub> of 30.4 mW cm <sup>-2</sup> and V <sub>LWC</sub> of 1 V)  | This work |

<sup>a)</sup>The adaptation decay constant is quantified by fitting the exponential decay model. <sup>b)</sup>The devices display various transient current responses, where the comparable energy consumptions of with/without adaptation are selected.

**Table S2.** Comparison of the proposed synaptic device and previously reported results.

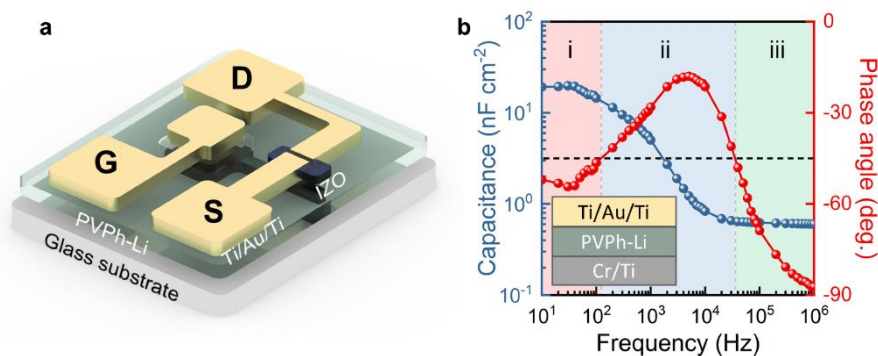

**Figure S11.** a) Schematic illustration of Li-NTR. The gate electrode near the IZO channel consisted of Cr/Ti stacked film and connected by Ti/Au/Ti pad for characterization. b) Frequency-dependent capacitance and phase angle curves for a PVPh-Li based MOM capacitor. The ionic polarization can be classified with a capacitive ( $|\theta| > 45^\circ$ ) or resistive ( $|\theta| < 45^\circ$ ) behavior. Three different frequency regions can be clearly divided: i) at low frequencies ( $f < 2 \times 10^2$  Hz,  $|\theta| > 45^\circ$ ), the formation of EDL in the PVPh-Li electrolyte is dominant for the capacitive behavior; ii) at medium frequencies ( $2 \times 10^2$  Hz  $< f < 4 \times 10^4$  Hz,  $|\theta| < 45^\circ$ ), the ion relaxation or ion migration is dominant for the resistive behavior; at high frequencies ( $f > 4 \times 10^4$  Hz,  $|\theta| > 45^\circ$ ), the dipolar relaxation of the PVPh-Li electrolyte is dominant for the capacitive behavior.

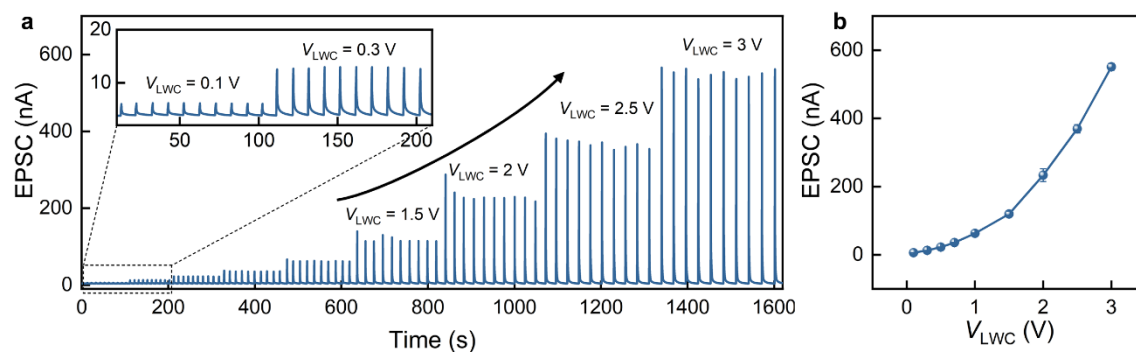

**Figure S12.** a) The EPSC responses under ten  $V_{LWC}$  with different pulse amplitudes (PW = 0.5 s). b) The plot of EPSC<sub>peak</sub> as a function of  $V_{LWC}$  amplitude.

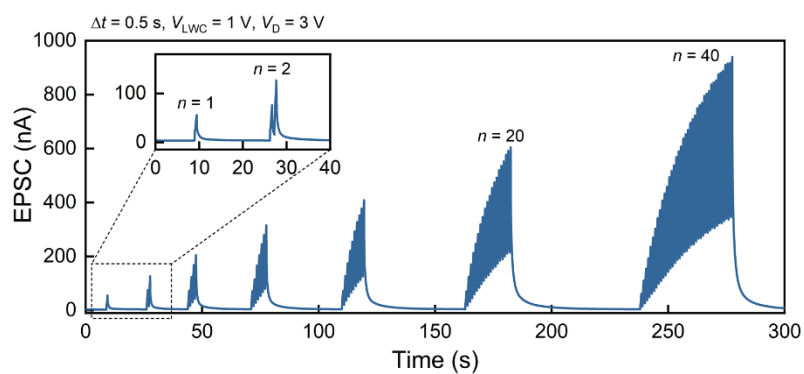

**Figure S13.** a) The EPSC responses to multiple  $V_{LWC}$  (1 V, 1 Hz). The inset is the EPSC response under  $n = 1$  and  $n = 2$ .

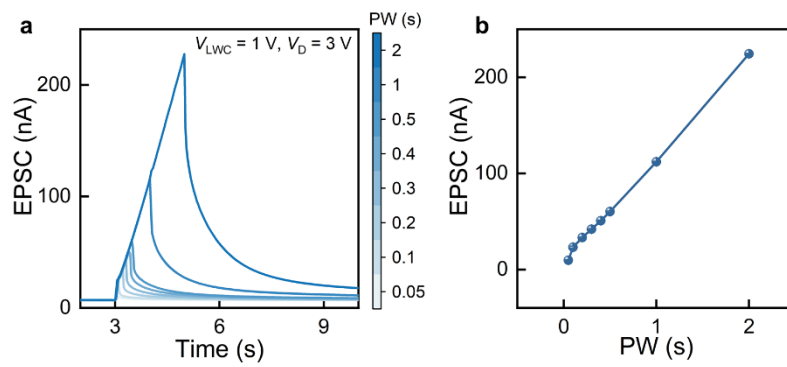

**Figure S14.** a) The EPSC responses to single  $V_{LWC}$  with different PWs. b) The plot of  $EPSC_{peak}$  as a function of PW.

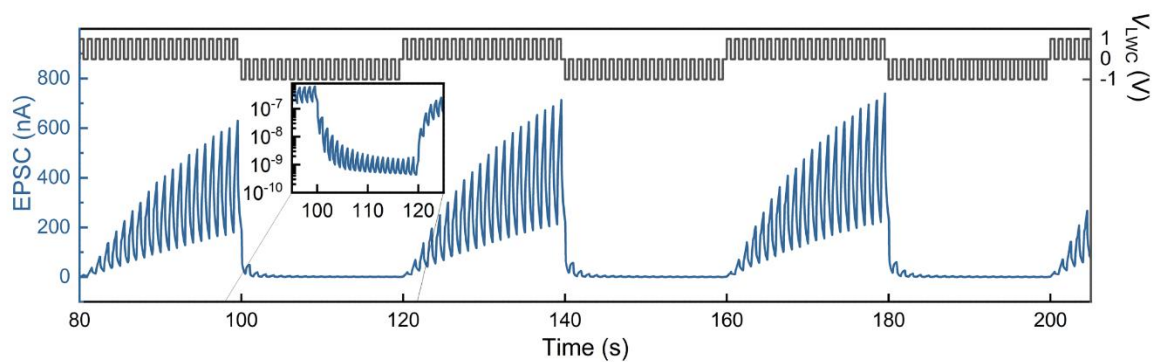

**Figure S15.** a) The EPSC responses of the Li-NTR by applying 20 positive and 20 negative  $V_{LWC}$ s with an amplitude of 1 V and  $-1$  V.

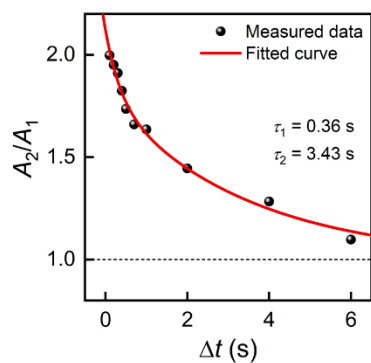

**Figure S16.** Dependence of PPF index ( $A_2/A_1$ ) on pulse delay ( $\Delta t$ ). The  $A_2/A_1$  decreases with increasing  $\Delta t$  in a simple double-exponential decay model, indicating that the present results are comparable to the biological synaptic plasticity.

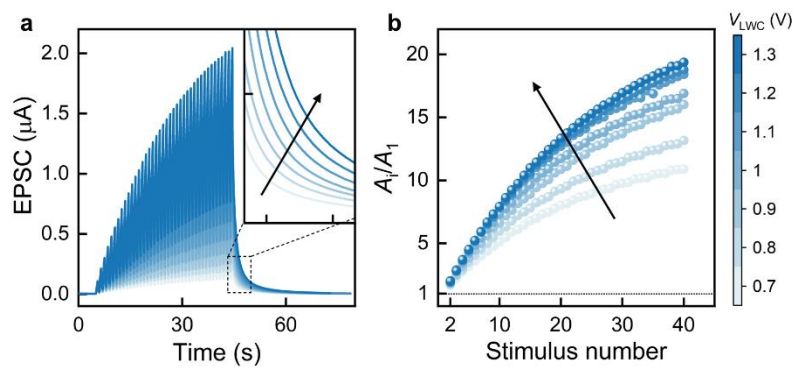

**Figure S17.** a) The EPSC responses under 40  $V_{LWC}$  with different pulse amplitudes. The inset is an enlarged view of the EPSC response under decaying. b) The plot of  $A_i/A_1$  vs. stimulus number for  $V_{LWC}$ . The  $A_i/A_1$  increases with increasing stimulus number and  $V_{LWC}$ .



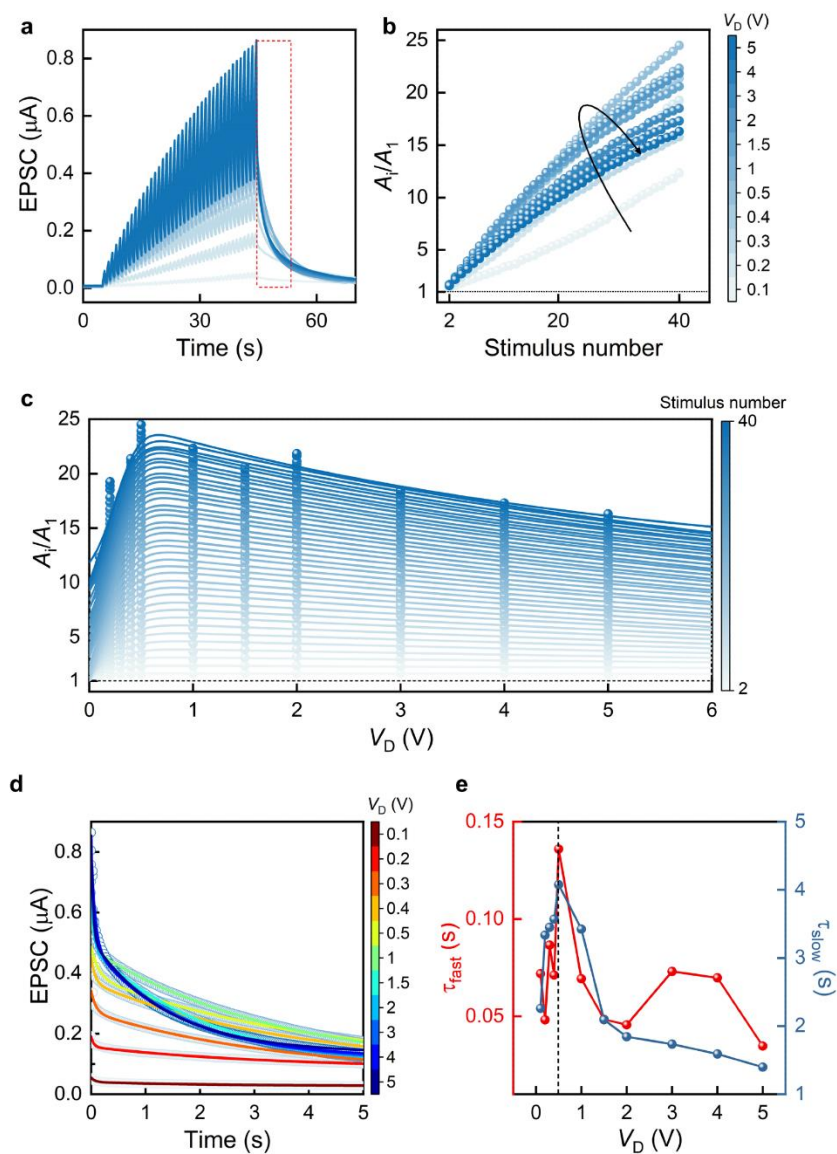

**Figure S18.** a) The EPSC responses under 40  $V_{\text{LWC}}$  with different  $V_D$ . b) The plots of  $A_i/A_1$  vs. stimulus number for  $V_D$ . The increasing trend of  $A_i/A_1$  increases with increasing stimulus number and  $V_D$  until  $V_D$  of 0.5 V, but steadily decreases with further increase in  $V_D$ . c) The plots of  $A_i/A_1$  vs.  $V_D$  for stimulus number. d) The enlarged view of decaying behavior of EPSC responses in a) and corresponding fitting curves with double-exponential model. e) The plots of  $\tau_{\text{fast}}$  and  $\tau_{\text{slow}}$  as a function of  $V_D$ . These results indicate that the facilitation and the decay properties of Li-NTR are influenced by  $V_D$ . Applying a high  $V_D$  can generate large in-plane electric fields in the IZO layer, providing a large driving force for extracting the trapped charges at the PVPPh-Li/IZO interface. This large driving force causes the fast EPSC decay.

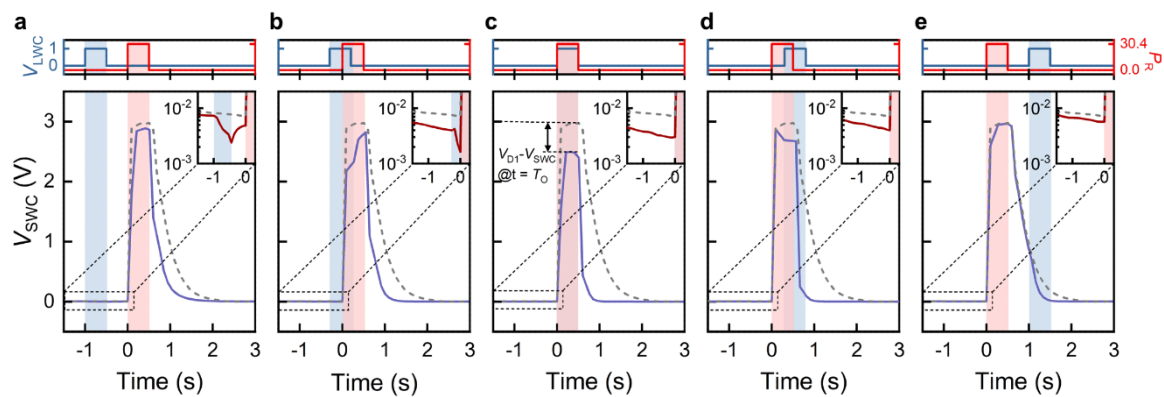

**Figure S19.** Transient changes of  $V_{SWC}$  at  $\Delta T$  are a)  $-1$  s, b)  $-0.3$  s, c)  $0$  s, d)  $0.3$  s, and e)  $1$  s, the peak values of  $V_{SWC}$  are obtained at  $\Delta T = 0$  s. These results indicate that the  $V_{SWC}$  responses are completely related to  $V_{LWC}$ .

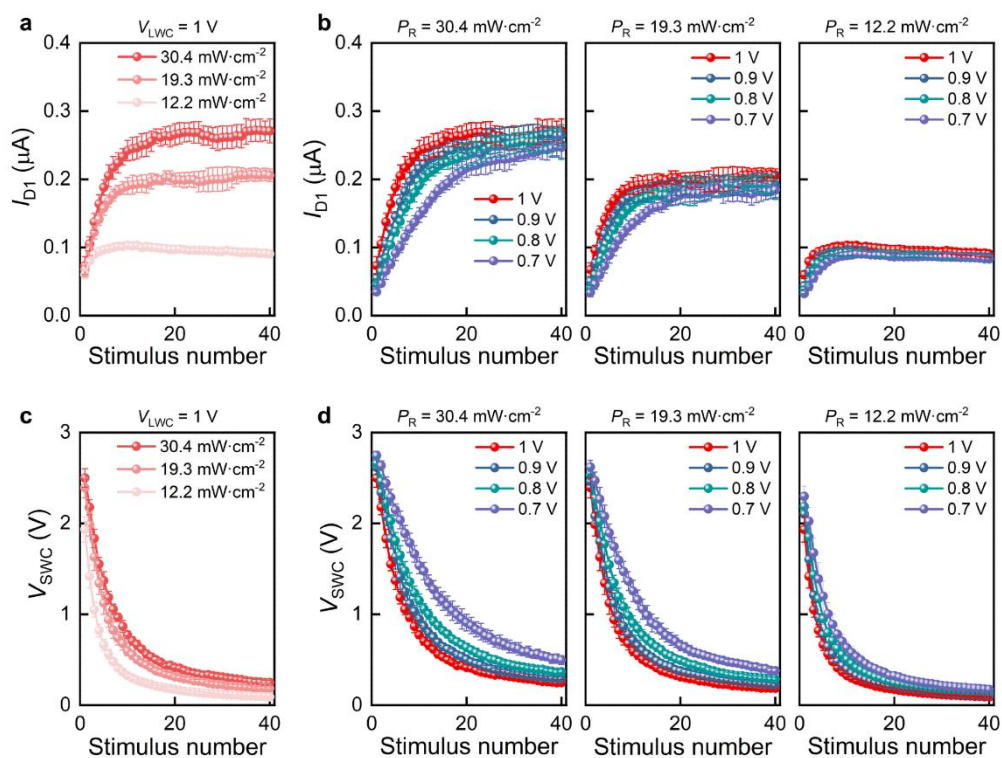

**Figure S20.** The peak values of  $I_{D1}$  vs. stimulus number are plotted a) under  $V_{LWC}$  of 1 V as a function of  $P_R$ . The peak values of  $I_{D1}$  are plotted b) under  $P_R$  of  $30.4 \text{ mW cm}^{-2}$  (left),  $19.3 \text{ mW cm}^{-2}$  (middle), and  $12.2 \text{ mW cm}^{-2}$  (right) with different  $V_{LWC}$ . The peak values of  $V_{SWC}$  vs. stimulus number are plotted a) under  $V_{LWC}$  of 1 V as a function of  $P_R$  and The peak values of  $V_{SWC}$  are plotted b) under  $P_R$  of  $30.4 \text{ mW cm}^{-2}$  (left),  $19.3 \text{ mW cm}^{-2}$  (middle), and  $12.2 \text{ mW cm}^{-2}$  (right) with different  $V_{LWC}$ .

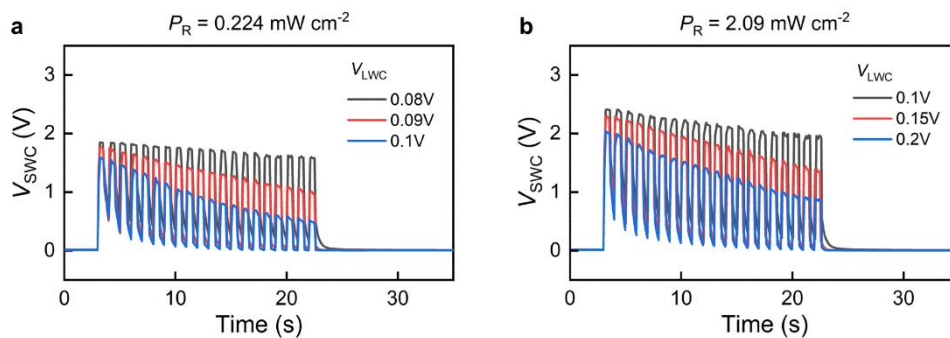

**Figure S21.** Dynamic  $V_{\text{SWC}}$  responses of the artificial photoreceptor under 20 optical stimuli a) 0.224 and b)  $2.09 \text{ mW cm}^{-2}$  with various  $V_{\text{LWC}}$ . Both pulsed optical and electrical stimuli are applied at the same period of 1 s and PW of 0.5 s.

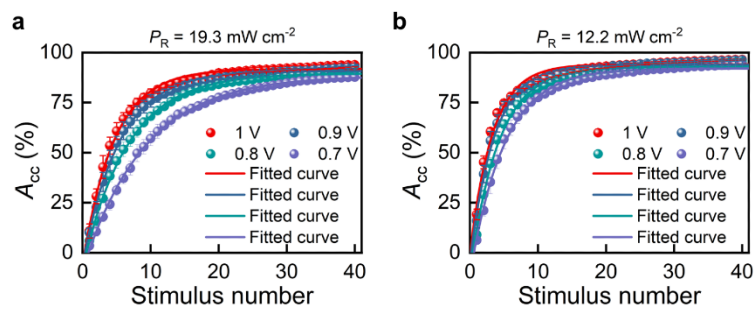

**Figure S22.** The accuracies vs. stimulus number are plotted under fixed  $P_R$  of a)  $19.3 \text{ mW cm}^{-2}$  and b)  $12.2 \text{ mW cm}^{-2}$  as a function of  $V_{LWC}$ .

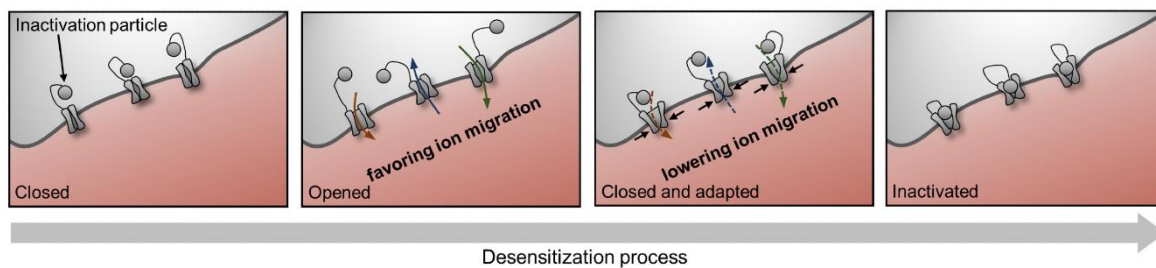

**Figure S23.** Schematic illustrations of the model for the desensitization process of mechanotransducer channels in a sensory neuron.

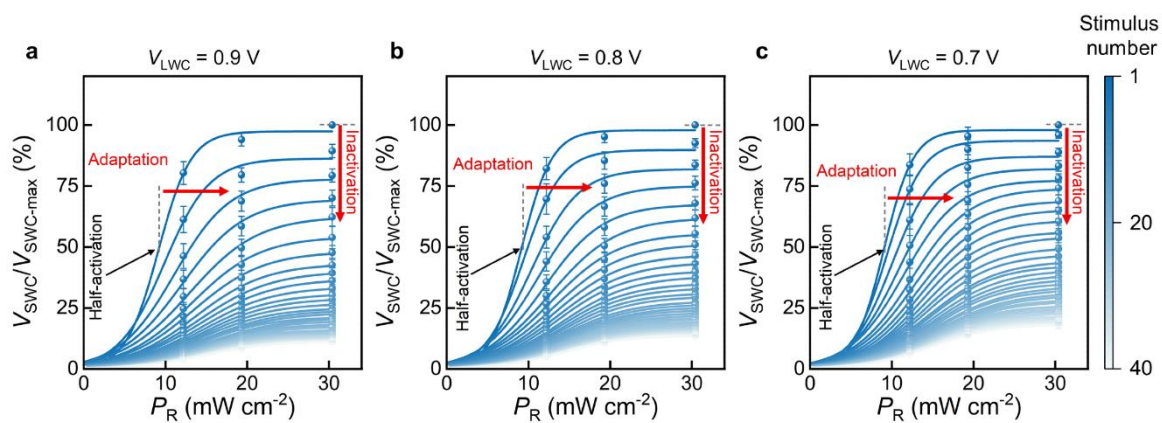

**Figure S24.** The normalized  $V_{\text{SWC}}$  vs.  $P_{\text{R}}$  are plotted under fixed  $V_{\text{LWC}}$  of a) 0.9 V, b) 0.8 V, and c) 0.7 V as a function of stimulus number.

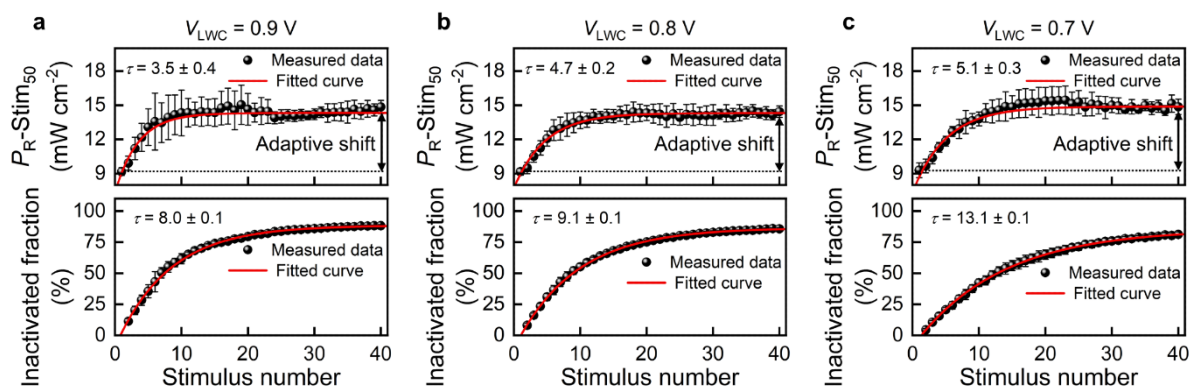

**Figure S25.** The calculated  $\text{Stim}_{50}$  and inactivation fraction vs. stimulus number are plotted under fixed  $V_{LWC}$  of 0.9 V, b) 0.8 V, and c) 0.7 V as a function of  $P_R$ .



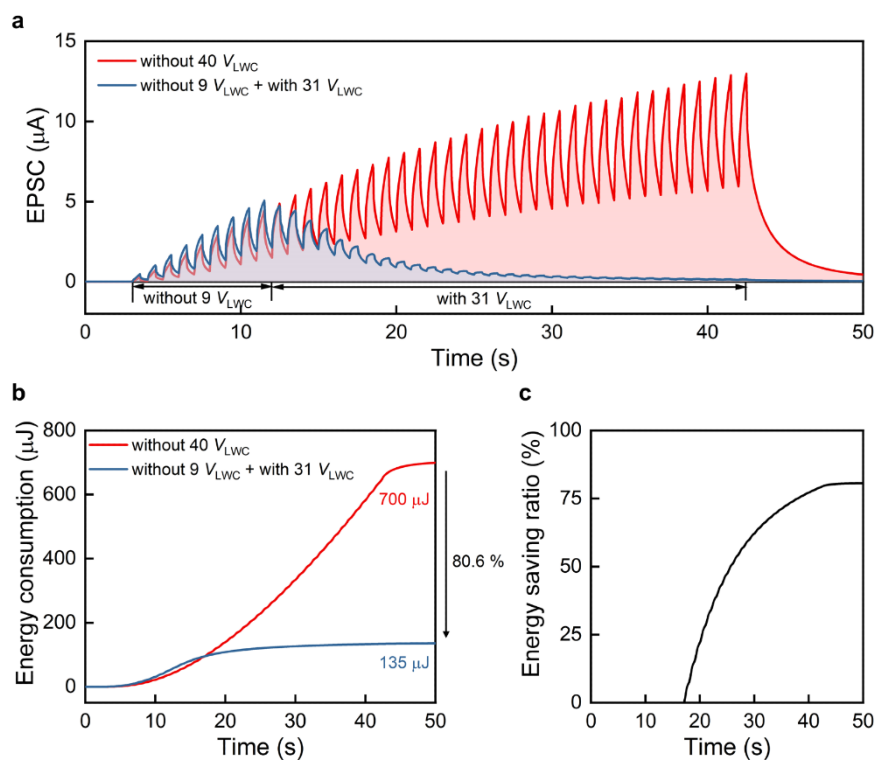

**Figure S26.** Energy consumption comparison of the DAVAN device. a) Transient EPSC responses of the DAVAN device derived from Figure 4c under repeated optical irradiations without  $V_{LWC}$  and the onset of  $V_{LWC}$  at the 10<sup>th</sup> stimulus. b) The energy consumption comparison and c) energy saving ratio of the DAVAN device with/without  $V_{LWC}$ . Here, the energy consumption of the response can be explained by the following equation  $E = \int V_{D2} \times EPSC dt$ .

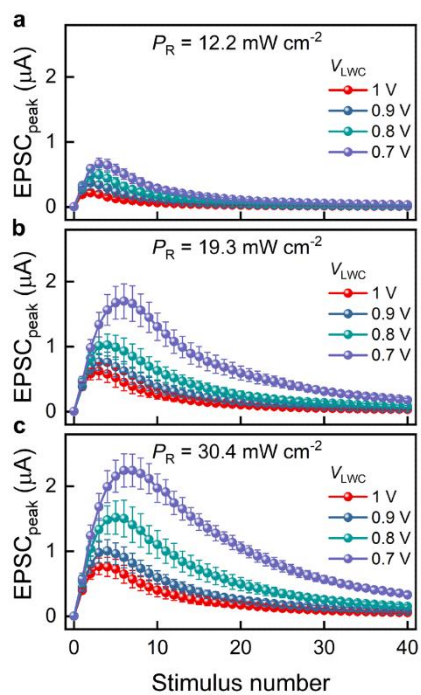

**Figure S27.** The  $\text{EPSC}_{\text{peak}}$  vs. stimulus number are plotted under fixed  $P_R$  of a)  $12.2 \text{ mW cm}^{-2}$ , b)  $19.3 \text{ mW cm}^{-2}$ , and c)  $30.4 \text{ mW cm}^{-2}$  as a function of  $V_{\text{LWC}}$ .

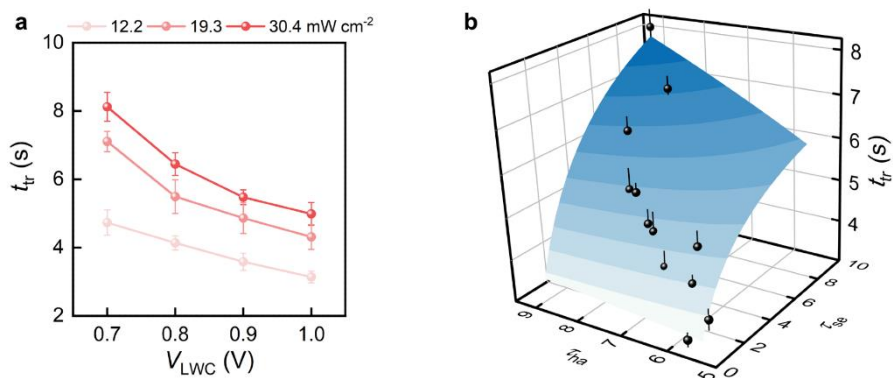

**Figure S28.** a) The derived  $t_{tr}$  vs.  $V_{LWC}$  are plotted as a function of  $P_R$ . b) 3D plot of  $t_{tr}$  as a function of  $\tau_{se}$  and  $\tau_{ha}$  and the fitted surface using Equation (S2).

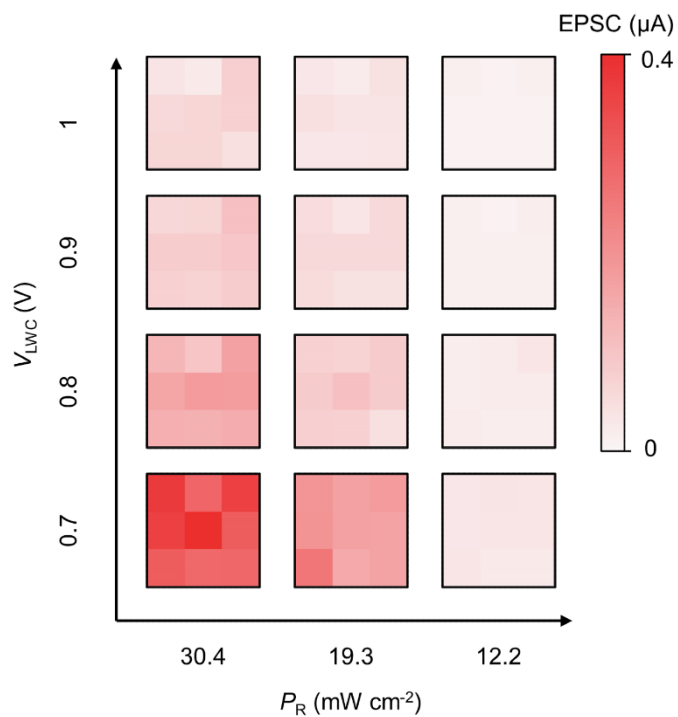

**Figure S29.** Encoded images of the EPSC of the 3 × 3 DAVAN device array at the 40<sup>th</sup> stimulus number under various optical (12.2–30.4 mW cm<sup>-2</sup>) and electrical (0.7–1 V) stimuli. These results indicate that the pixels investigated are functional with satisfactory uniformity.

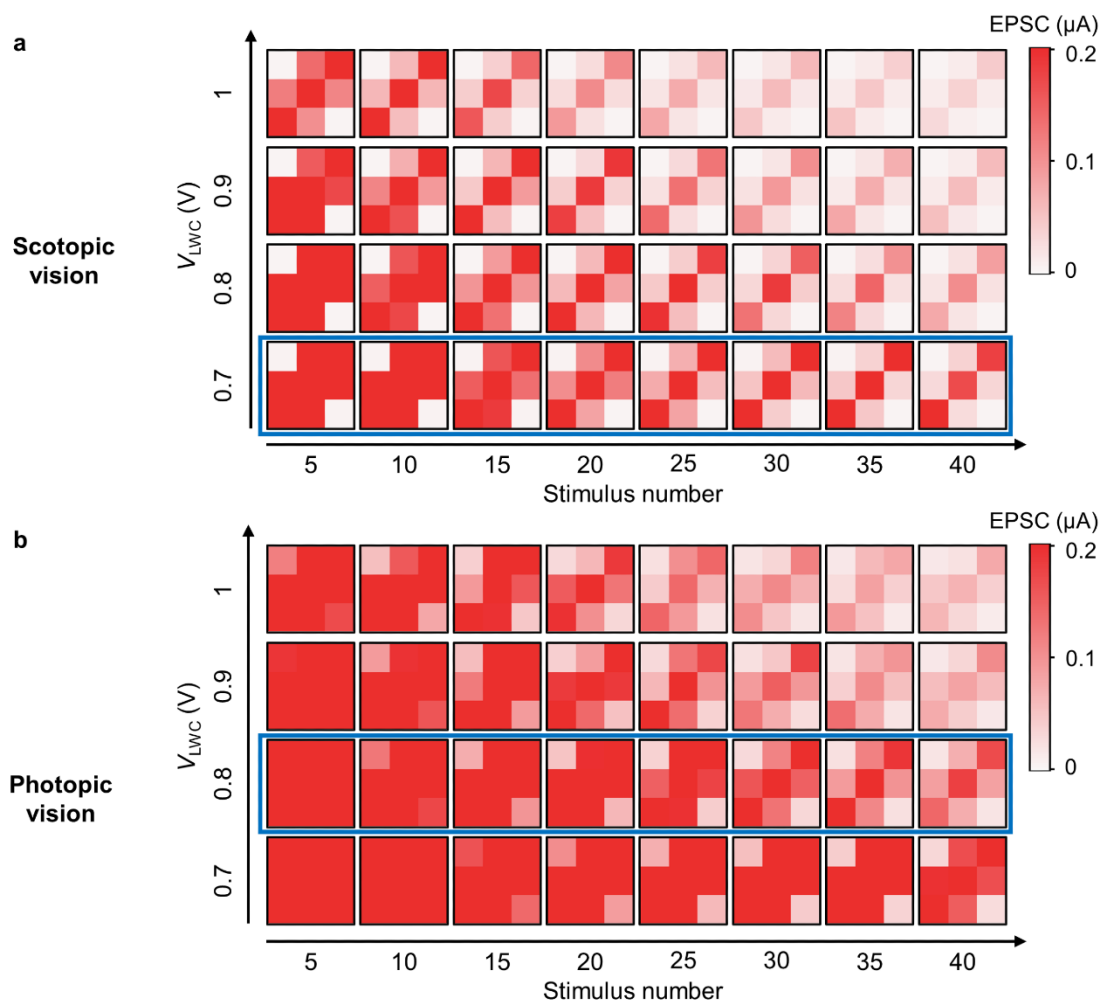

**Figure S30.** Encoded image sets of the  $3 \times 3$  DAVAN device array under light irradiation with various  $V_{LWC}$  such as a) scotopic vision and b) photopic vision.

## Reference

- [S1] J. Hao, P. Delmas, *J. Neurosci.* **2010**, *30*, 13384.
- [S2] J.-Y. Kim, E. K. Lee, J. Jung, D.-W. Lee, Y. Yun, J. W. Chung, J.-I. Park, J.-J. Kim, *J. Mater. Chem. C* **2019**, *7*, 5821.
- [S3] W. Lee, J. Lee, H. Yun, J. Kim, J. Park, C. Choi, D. C. Kim, H. Seo, H. Lee, J. W. Yu, W. B. Lee, D.-H. Kim, *Adv. Mater.* **2017**, *29*, 1702902.
- [S4] H. Zheng, W. Wang, Y. Liu, J. Sun, *J. Power Sources* **2017**, *344*, 46.
- [S5] X. Yang, Y. Fang, Z. Yu, Z. Wang, T. Zhang, M. Yin, M. Lin, Y. Yang, Y. Cai, R. Huang, *Nanoscale* **2016**, *8*, 18897.
- [S6] T. Shi, J. F. Wu, Y. Liu, R. Yang, X. Guo, *Adv. Electron. Mater.* **2017**, *3*, 1700046.
- [S7] C. Wan, P. Cai, X. Guo, M. Wang, N. Matsuhisa, L. Yang, Z. Lv, Y. Luo, X. J. Loh, X. Chen, *Nat. Commun.* **2020**, *11*, 1.
- [S8] S. Hong, S. H. Choi, J. Park, H. Yoo, J. Y. Oh, E. Hwang, D. H. Yoon, S. Kim, *ACS Nano* **2020**, *14*, 9796.
- [S9] Z. Wu, J. Lu, T. Shi, X. Zhao, X. Zhang, Y. Yang, F. Wu, Y. Li, Q. Liu, M. Liu, *Adv. Mater.* **2020**, *32*, 2004398.
- [S10] H. L. Park, H. Kim, D. Lim, H. Zhou, Y. H. Kim, Y. Lee, S. Park, T. W. Lee, *Adv. Mater.* **2020**, *32*, 1906899.
- [S11] S. M. Kwon, S. W. Cho, M. Kim, J. S. Heo, Y. H. Kim, S. K. Park, *Adv. Mater.* **2019**, *31*, 1906433.
- [S12] C. Qian, Y. Choi, Y. J. Choi, S. Kim, Y. Y. Choi, D. G. Roe, M. S. Kang, J. Sun, J. H. Cho, *Adv. Mater.* **2020**, *32*, 2002653.
- [S13] S. Wang, C. Chen, Z. Yu, Y. He, X. Chen, Q. Wan, Y. Shi, D. W. Zhang, H. Zhou, X. Wang, P. Zhou, *Adv. Mater.* **2019**, *31*, 1806227.
- [S14] D. Xie, L. Wei, M. Xie, L. Jiang, J. Yang, J. He, J. Jiang, *Adv. Funct. Mater.* **2021**, *31*, 2010655.

- [S15] H. Shen, Z. He, W. Jin, L. Xiang, W. Zhao, C.-a. Di, D. Zhu, *Adv. Mater.* **2019**, *31*, 1905018.
- [S16] J. Li, D. Jiang, Y. Yang, Y. Zhou, Q. Chen, J. Zhang, *Adv. Electron. Mater.* **2020**, *6*, 1901363.
- [S17] J. Yu, G. Gao, J. Huang, X. Yang, J. Han, H. Zhang, Y. Chen, C. Zhao, Q. Sun, Z. L. Wang, *Nat. Commun.* **2021**, *12*, 1.
- [S18] H. Faber, M. Burkhardt, A. Jedaa, D. Kälblein, H. Klauk, M. Halik, *Adv. Mater.* **2009**, *21*, 3099.
- [S19] C. Zhang, W. B. Ye, K. Zhou, H. Y. Chen, J. Q. Yang, G. Ding, X. Chen, Y. Zhou, L. Zhou, F. Li, S.-T. Han, *Adv. Funct. Mater.* **2019**, *29*, 1808783.
- [S20] X. Yao, K. Klyukin, W. Lu, M. Onen, S. Ryu, D. Kim, N. Emond, I. Waluyo, A. Hunt, J. A. del Alamo, J. Li, B. Yildiz, *Nat. Commun.* **2020**, *11*, 1.
- [S21] M.-J. Park, Y. Park, J.-S. Lee, *ACS Appl. Electron. Mater.* **2020**, *2*, 339.
- [S22] Z. He, H. Shen, D. Ye, L. Xiang, W. Zhao, J. Ding, F. Zhang, C.-a. Di, D. Zhu, *Nat. Electron.* **2021**, *4*, 522.
